# Supplementary material for: Dimensionally anisotropic graphene with high mobility and a high on–off ratio in a three-terminal RRAM device
Source: Royal Society of Chemistry journal article supplement (doi:10.1039/d0qm00152j), 2020-01-01
Supplement: d0qm00152j1.pdf [file d0qm00152j1.pdf]

## Supporting Information for:

### **Dimensional Anisotropic Graphene with High Mobility and High On-Off Ratio in three-terminal RRAM device**

Bo Liu<sup>a\*</sup>, Han Hsiang Tai<sup>b</sup>, Hanyuan Liang<sup>b</sup>, En-Yan Zheng<sup>c</sup>, Mamina Sahoo<sup>b</sup>, Chih Hsien Hsu<sup>b</sup>,  
Tsung-Cheng Chen<sup>b</sup>, Chin An Huang<sup>c</sup>, Jer-Chyi Wang<sup>b</sup>, Tuo-Hung Hou<sup>d</sup>, Chao-Sung Lai<sup>b,e,f,g\*</sup>

<sup>a</sup> Faculty of Information Technology, College of Microelectronics, Beijing University of Technology, Beijing, 100124, People's Republic of China

<sup>b</sup> Department of Electronic Engineering, Chang Gung University, Guishan Dist., 33302, Taoyuan, Taiwan

<sup>c</sup> Department of Mechanical Engineering, Chang Gung University, Taoyuan 33302, Taoyuan, Taiwan

<sup>d</sup> Department of Electronics Engineering and Institute of Electronics, National Chiao Tung University, Hsinchu, 300, Taiwan

<sup>e</sup> Biosensor Group, Biomedical Engineering Research Center, Chang Gung University, Guishan Dist., 33302, Taoyuan, Taiwan

<sup>f</sup> Department of Nephrology, Chang Gung Memorial Hospital, Guishan Dist., 33305, Linkou, Taiwan

<sup>g</sup> Department of Materials Engineering, Ming Chi University of Technology, Taishan Dist., 24301, New Taipei City, Taiwan

E-mail address: boliu.ele@bjut.edu.cn and cslai@mail.cgu.edu.tw

Key words: Graphene, Dimensional Anisotropic, Three-terminal RRAM, High mobility, High On-Off Ratio, Ultra-low Off-State Current.

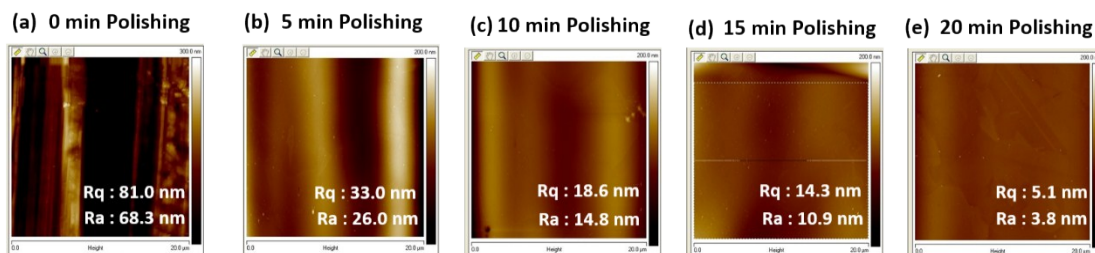

**Figure S1**, AFM images of the Cu foil ( $20\ \mu\text{m} \times 20\ \mu\text{m}$ ) surface morphologies after 0 min (a), 5 min (b), 10 min (c), 15 min (d), and 20 min (e) of electrochemical polishing. The electrochemical polishing platform and process are illustrated in Figure 2 (c-e).

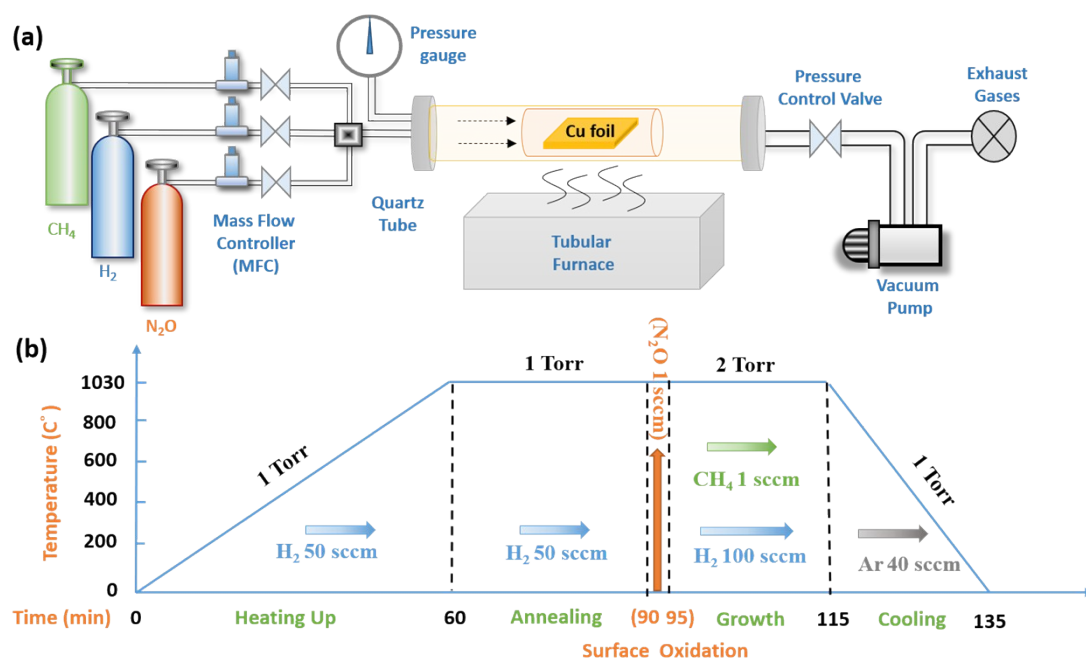

**Figure S2**, Illustration (a) and growth parameters (b) of chemical vapor deposition of graphene, utilizing  $\text{N}_2\text{O}$  as the oxidation gas precursor. Note that for the normal case, all conditions are the same except for the 5 min of  $\text{N}_2\text{O}$  flow.

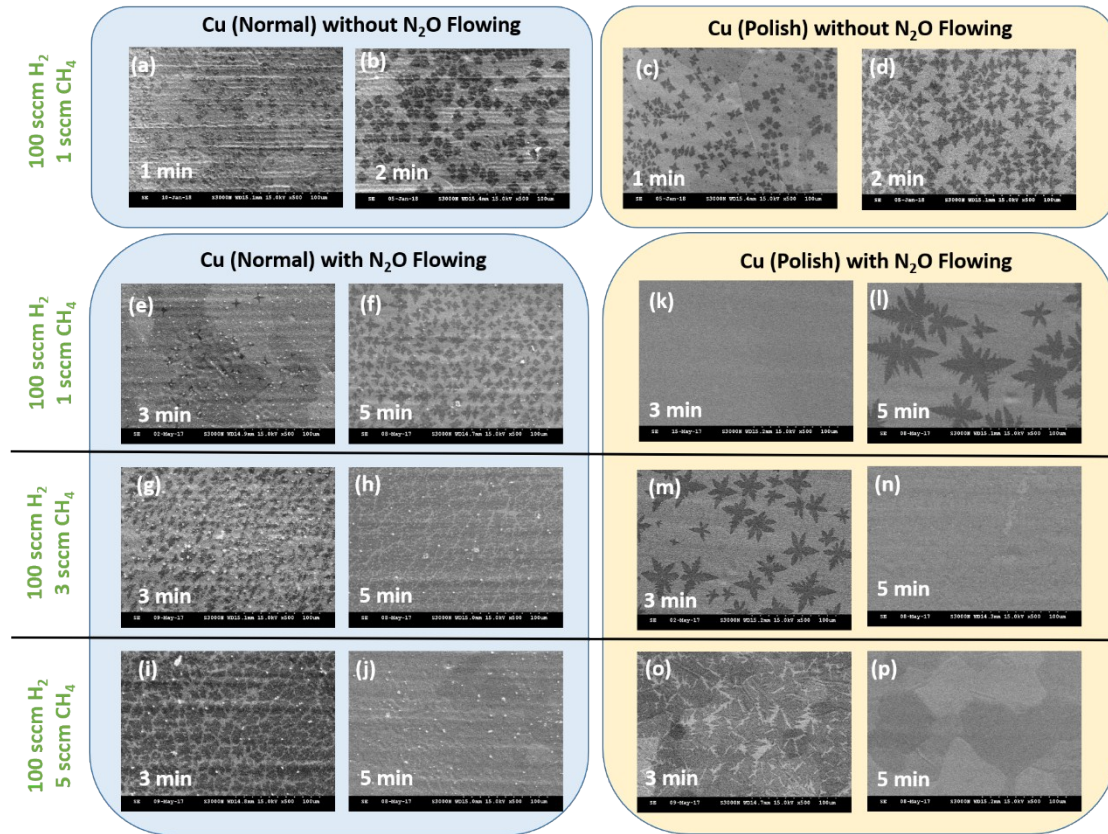

**Figure S3**, SEM images of graphene growth on Cu (normal) (a-b), Cu (polish) (c-d); Cu (normal) with and Cu (polish) with a  $N_2O$  gas flow and with different  $H_2/CH_4$  gas flow ratios. Note that (k) indicates that 1. the  $N_2O$  flow completely oxidized the Cu surface, and 2. compared to (e), the rough Cu surface has a greater chance for  $H_2$  surface reduction and carbon atom nucleation; in other words, the rough Cu surface is more chemically active. As an optimization result of those 16 SEM images, the condition (k-i) was chosen for further study.

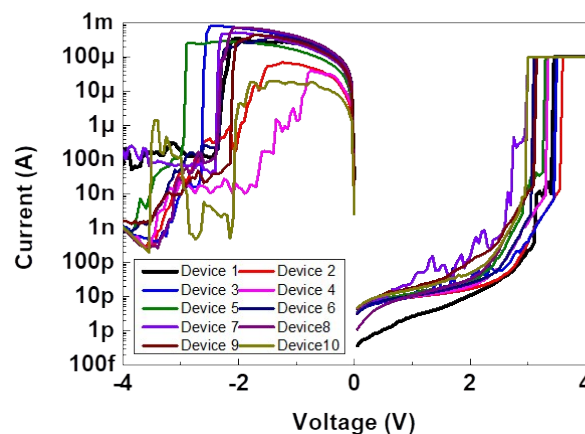

**Figure S4**, IV curve of Set and Reset processes of 10 different graphene-based RRAM, where CC at  $100 \mu A$ .
